# Supplementary material for: Astaxanthin mitigates ethanol-induced mitochondrial dysfunction and activation of mitochondrial unfolded protein response in Kupffer cells
Source: Research Square preprint supplement (doi:10.21203/rs.3.rs-6779003/v1), 2025-06-18
Supplement: Supplementary file 1 [file 464374661560e9f07be7a948.pdf]

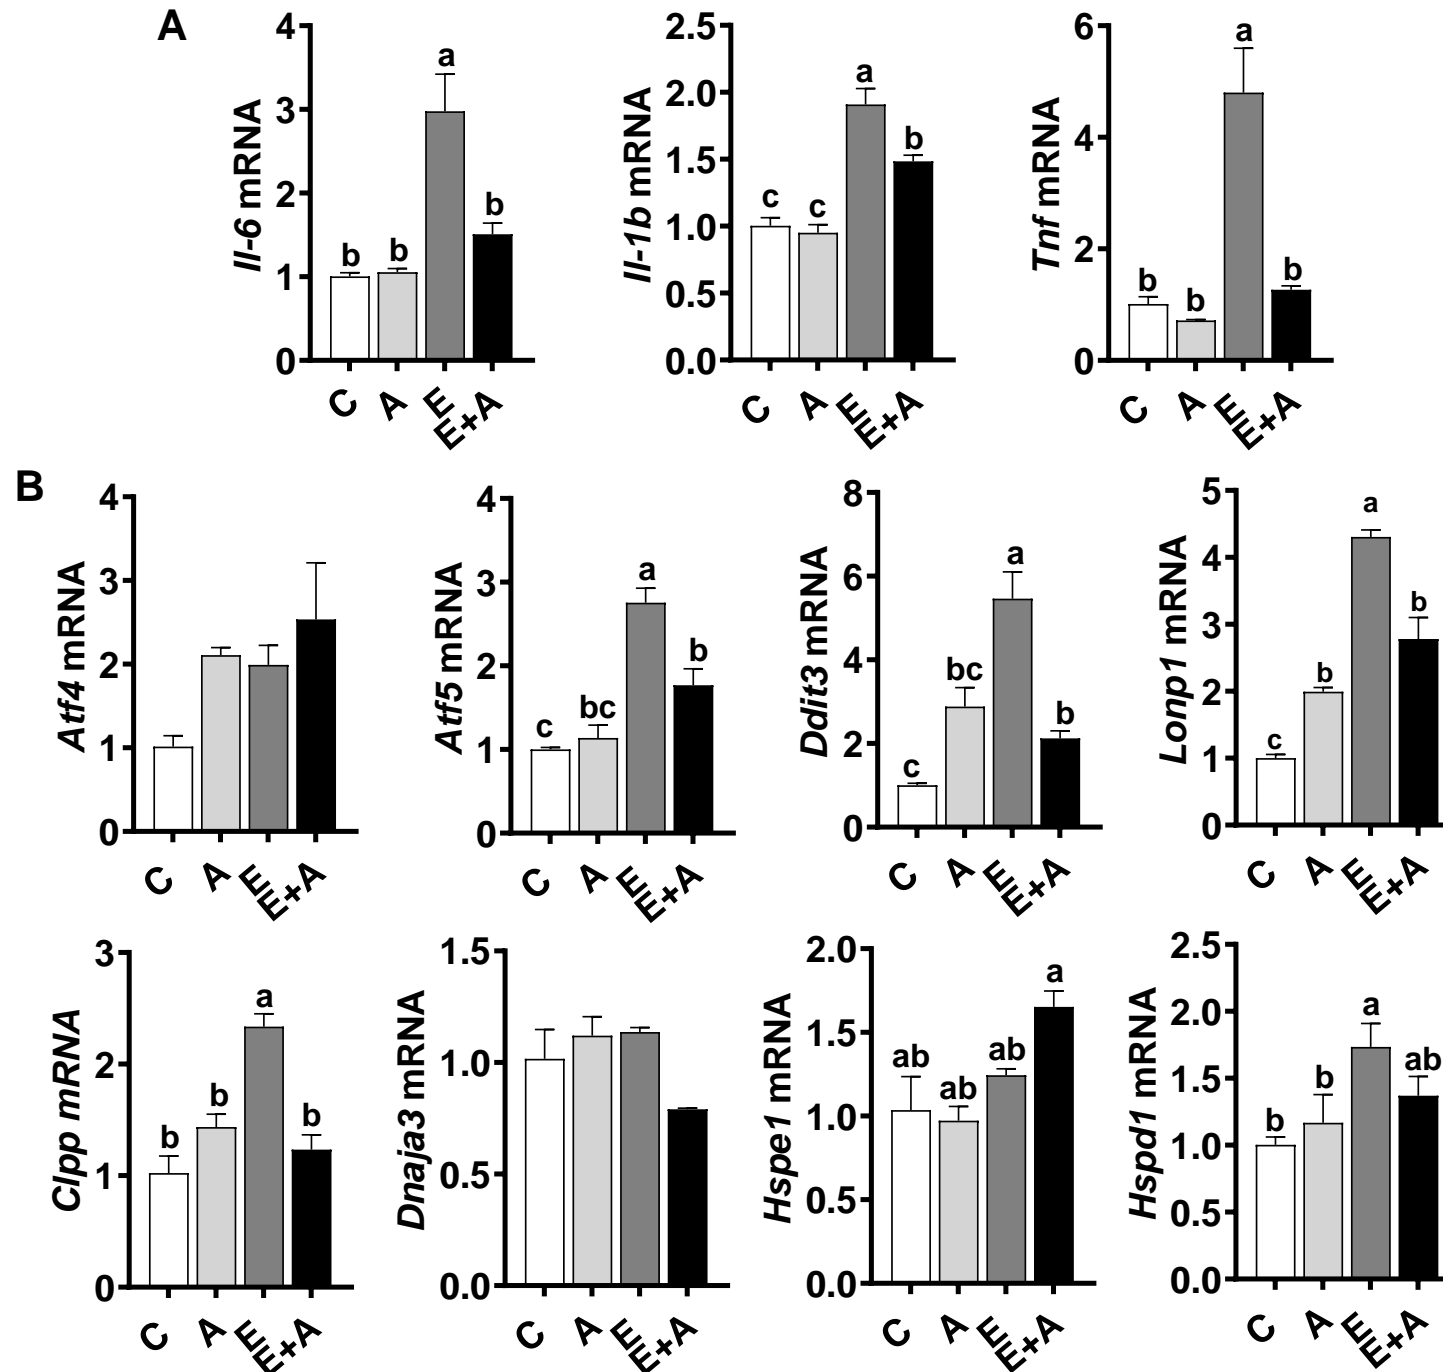

### Supplemental Figure S1.

ASTX mitigates ethanol-induced upregulation of inflammatory and UPR<sup>mt</sup>-related genes in BMMs. Cells were pre-treated with 25  $\mu$ M ASTX and then with 25  $\mu$ M ASTX and 80 mM ethanol for 72 h to evaluate mRNA expression. **(A)** Inflammatory genes. **(B)** UPR<sup>mt</sup>-related genes. C, A, E, and E+A denote the control, ASTX, ethanol, and ethanol plus ASTX treatment groups, respectively. Values are presented as mean  $\pm$  SEM. Bars with different letters represent statistically significant differences ( $P < 0.05$ ), as determined by two-way ANOVA followed by Tukey's post-hoc test.
